# Supplementary material
Source: MDPI journal article supplement (https://www.mdpi.com/2571-6255/5/5/159)
Supplement: s1 [file s1]

**Table S1.** Confusion matrix of the accuracy assessment of the area

|                              |                                     | Reference Data                       |                      |                             |                                    |                              |                                     |                            |                   | User Accuracy | User Accuracy Variance |
|------------------------------|-------------------------------------|--------------------------------------|----------------------|-----------------------------|------------------------------------|------------------------------|-------------------------------------|----------------------------|-------------------|---------------|------------------------|
|                              |                                     | Impervious surfaces / Roads / cement | Evergreen vegetation | Burnt area / low vegetation | Rural area/ Low vegetation / Grass | Urban area / infrastructures | Rural area/ Low vegetation / Shrubs | <i>Pinus brutia</i> forest | Agricultural land |               |                        |
| Classification Data          | Impervious surfaces/Roads/ cement   | 65                                   | 3                    | 0                           | 14                                 | 0                            | 11                                  | 6                          | 1                 | 65,00%        | 9,40%                  |
|                              | Evergreen vegetation                | 0                                    | 69                   | 0                           | 17                                 | 0                            | 13                                  | 1                          | 0                 | 69,00%        | 9,11%                  |
|                              | Burnt area / low vegetation         | 0                                    | 0                    | 100                         | 0                                  | 0                            | 0                                   | 0                          | 0                 | 100,00%       | 0,00%                  |
|                              | Rural area/ Low vegetation / Grass  | 0                                    | 7                    | 0                           | 76                                 | 0                            | 12                                  | 1                          | 4                 | 76,00%        | 8,41%                  |
|                              | Urban area / infrastructures        | 3                                    | 0                    | 0                           | 0                                  | 97                           | 0                                   | 0                          | 0                 | 97,00%        | 3,36%                  |
|                              | Rural area/ Low vegetation / Shrubs | 0                                    | 11                   | 0                           | 7                                  | 0                            | 76                                  | 4                          | 2                 | 76,00%        | 8,41%                  |
|                              | <i>Pinus brutia</i> forest          | 0                                    | 0                    | 0                           | 3                                  | 0                            | 5                                   | 92                         | 0                 | 92,00%        | 5,34%                  |
|                              | Agricultural land                   | 0                                    | 1                    | 0                           | 6                                  | 0                            | 6                                   | 0                          | 87                | 87,00%        | 6,62%                  |
|                              | Weights                             | 100                                  | 100                  | 100                         | 100                                | 100                          | 100                                 | 100                        | 100               |               |                        |
| Producer Accuracy            |                                     | 95,59%                               | 75,82%               | 100,00%                     | 61,79%                             | 100,00%                      | 61,79%                              | 88,46%                     | 92,55%            |               |                        |
| Producer Accuracy Variance   |                                     | 4,76%                                | 7,76%                | 0,00%                       | 6,87%                              | 0,00%                        | 6,93%                               | 5,70%                      | 5,08%             |               |                        |
| Portmanteau Accuracy         |                                     | 95,25%                               | 93,38%               | 100,00%                     | 91,13%                             | 99,63%                       | 91,13%                              | 97,50%                     | 97,50%            |               |                        |
| Portmanteau Accuracy Partial |                                     | 63,11%                               | 56,56%               | 100,00%                     | 51,70%                             | 97,00%                       | 51,70%                              | 82,14%                     | 81,31%            |               |                        |

|                           |      |
|---------------------------|------|
| Overall Accuracy          | 0,83 |
| Overall Accuracy Variance | 0,02 |
| Allocation Disagreement   | 0,11 |
| Shift                     | 0,02 |
| Exchange                  | 0,09 |
| Quantity Disagreement     | 0,06 |
| AMI                       | 2,15 |
| AMI Adjusted              | 2,14 |
| AMI Variance              | 0,10 |
| Kappa                     | 0,80 |
| Kappa Variance            | 0,03 |
